# Supplementary material for: Targeted Isolation of a Cytotoxic Cyclic Hexadepsipeptide from the Mesophotic Zone Sponge-Associated Fungus Cymostachys sp. NBUF082
Source: MDPI journal article supplement (doi:10.3390/md19100565), 2021-10-11
Supplement: s1 [file s1]

# Supplementary Information

## Targeted Isolation of a Cytotoxic Cyclic Hexadepsipeptide from the Mesophotic Zone Sponge-Associated Fungus *Cymostachys* sp. NBUF082

Ye Yuan <sup>1,2</sup>, Te Li <sup>1,2</sup>, Tingting Wang <sup>1,\*</sup>, C. Benjamin Naman <sup>1</sup>, Jing Ye <sup>3</sup>, Xingxin Wu <sup>3</sup>, J. Enrico H. Lazaro <sup>4</sup>, Xiaojun Yan <sup>2,\*</sup>, Shan He <sup>1,\*</sup>

<sup>1</sup> Department of Marine Pharmacy, Li Dak Sum Marine Biopharmaceutical Research Center, College of Food and Pharmaceutical Sciences, Ningbo University, Ningbo, Zhejiang 315832, China; 23yuanye@163.com (Y.Y.); telinbu@163.com (T.L.); bnaman@nbu.edu.cn (C.B.N.)

<sup>2</sup> School of Marine Science, Ningbo University, Ningbo 315211, China

<sup>3</sup> State Key Laboratory of Pharmaceutical Biotechnology, School of Life Sciences, Nanjing University, Nanjing 210023, China; DG1930079@mail.nju.edu.cn (J.Y.); xingxin.wu@nju.edu.cn (X.W.)

<sup>4</sup> National Institute of Molecular Biology and Biotechnology, University of the Philippines Diliman, Quezon 1101, Philippines; [jaylazaro@mbb.upd.edu.ph](mailto:jaylazaro@mbb.upd.edu.ph)

\* Correspondence: wangtingting1@nbu.edu.cn (T.W.); yanxiaojun@nbu.edu.cn (X.Y.); heshan@nbu.edu.cn (S.H.)

## Table of Contents

|                                                                                                                                                                                                                      |    |
|----------------------------------------------------------------------------------------------------------------------------------------------------------------------------------------------------------------------|----|
| <b>Figure S1.</b> LC-MS/MS-derived molecular network of extracts from the fungus <i>Cymostachys</i> sp. NBUF082. The targeted nodes correlating to cyclic hexadepsipeptides were involved in the framed cluster..... | 3  |
| <b>Figure S2.</b> <sup>1</sup> H NMR spectrum of <b>1</b> in CDCl <sub>3</sub> (600 MHz). ....                                                                                                                       | 4  |
| <b>Figure S3.</b> <sup>13</sup> C NMR spectrum of <b>1</b> in CDCl <sub>3</sub> (150 MHz). ....                                                                                                                      | 5  |
| <b>Figure S4.</b> DEPT135 spectrum of <b>1</b> in CDCl <sub>3</sub> (150 MHz).....                                                                                                                                   | 6  |
| <b>Figure S5.</b> <sup>1</sup> H- <sup>1</sup> H COSY spectrum of <b>1</b> in CDCl <sub>3</sub> .....                                                                                                                | 7  |
| <b>Figure S6.</b> HSQC spectrum of <b>1</b> in CDCl <sub>3</sub> . ....                                                                                                                                              | 8  |
| <b>Figure S7.</b> HMBC spectrum of <b>1</b> in CDCl <sub>3</sub> . ....                                                                                                                                              | 9  |
| <b>Figure S8.</b> Chromatographic profiles of amino acids from compound <b>1</b> acid hydrolysis products.....                                                                                                       | 11 |
| <b>Figure S9.</b> Chiral HPLC analysis performed on hydrolysis products of <b>1</b> . ....                                                                                                                           | 12 |

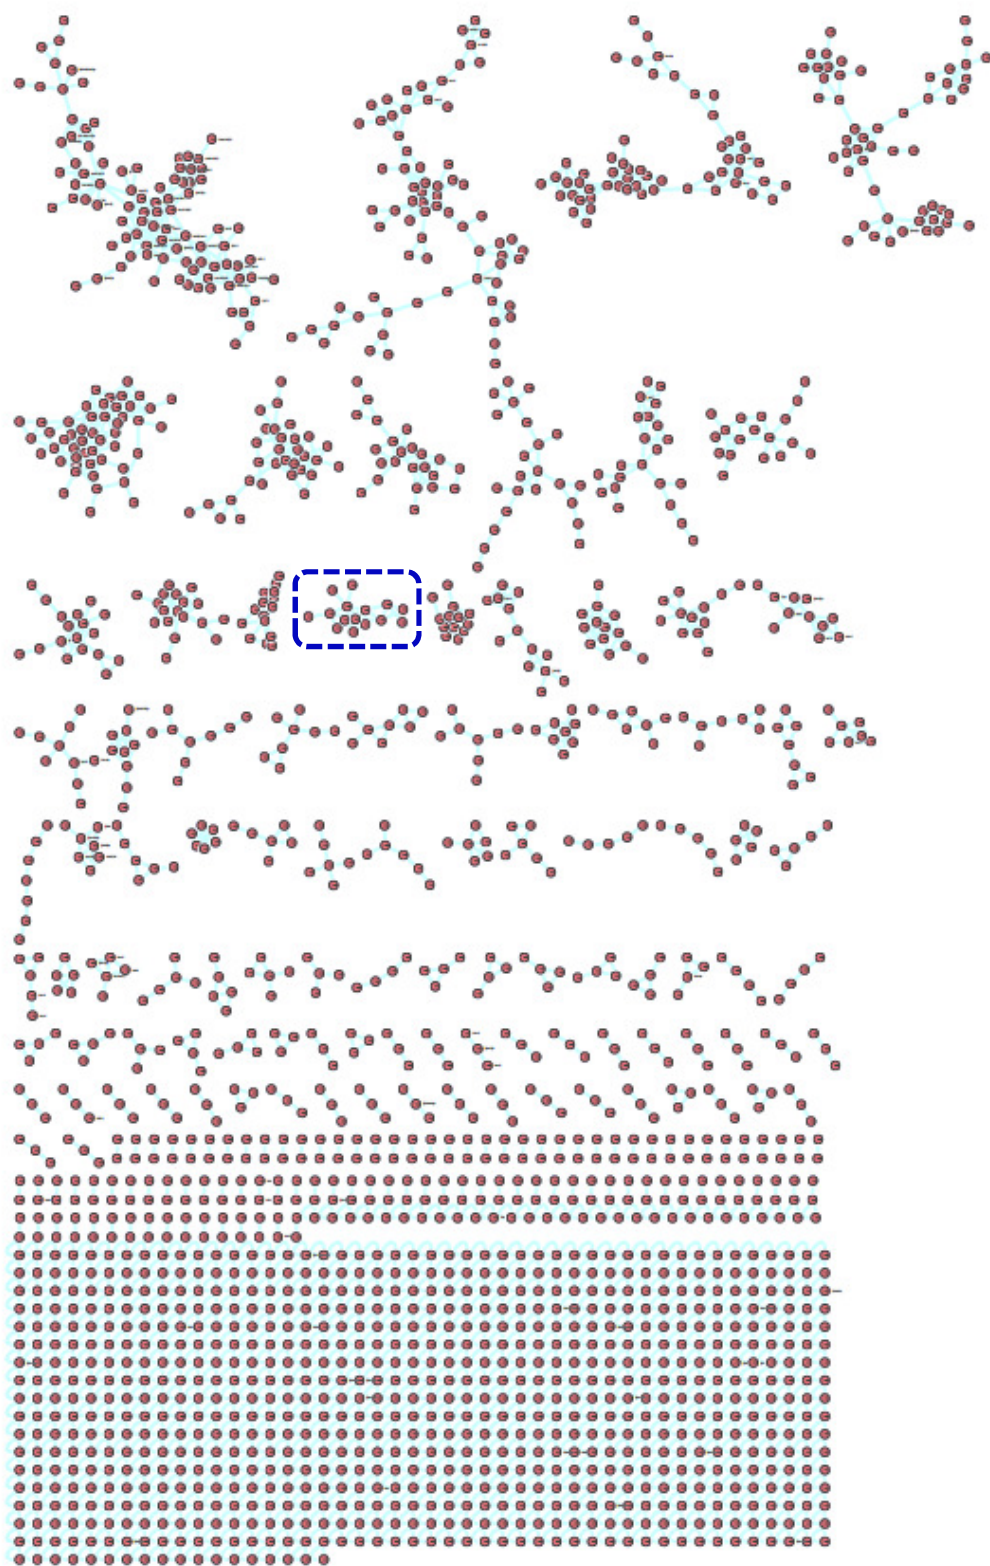

**Figure S1.** LC-MS/MS-derived molecular network of extracts from the fungus *Cymostachys* sp. NBUF082. The targeted nodes correlating to cyclic hexadepsipeptides were involved in the framed cluster.

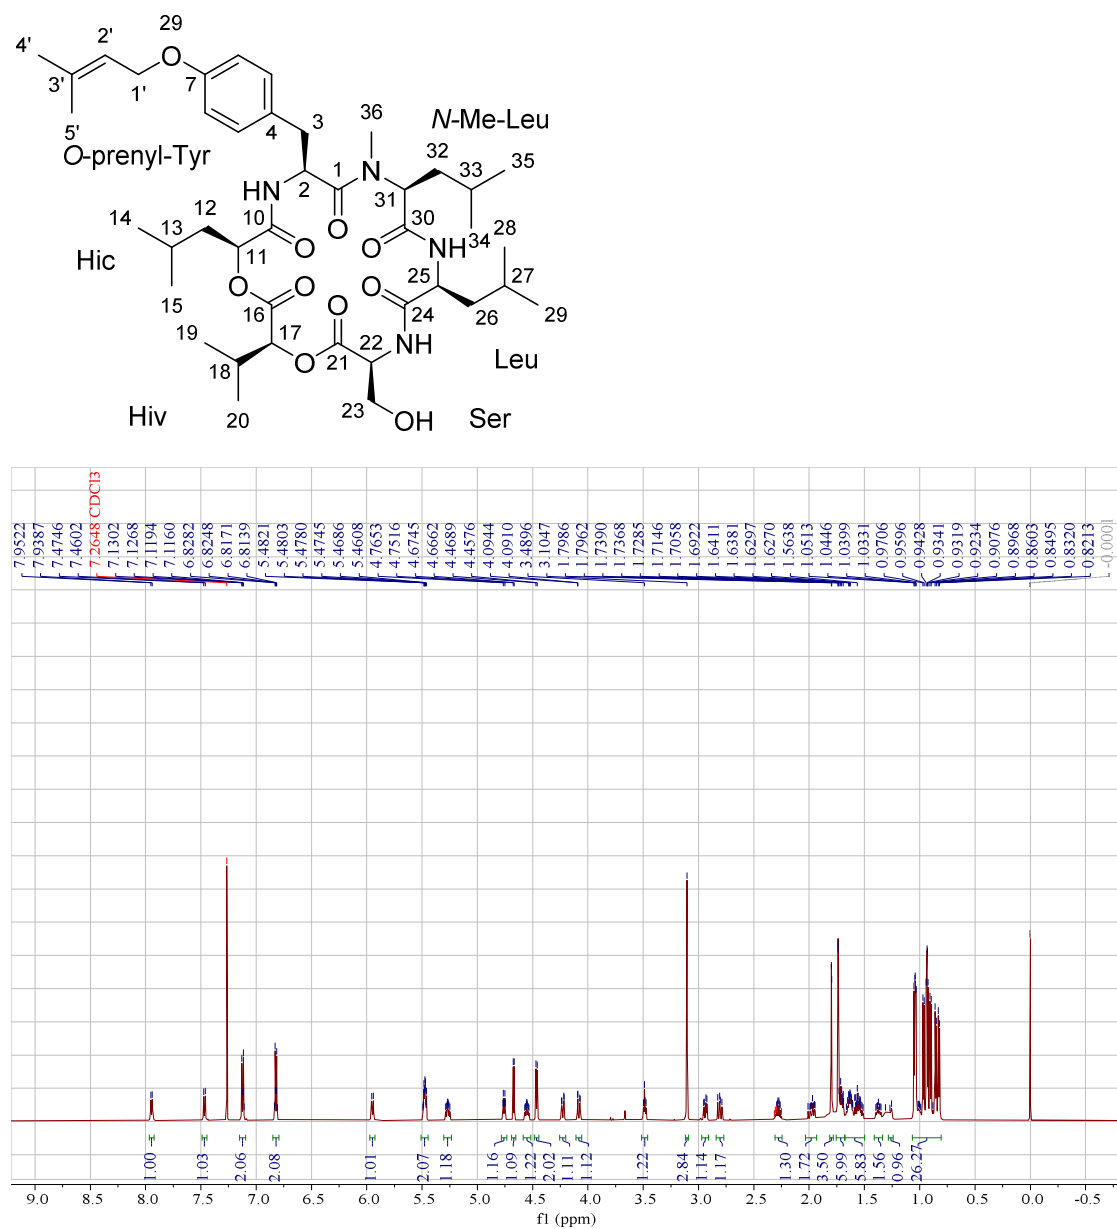

**Figure S2.**  $^1\text{H}$  NMR spectrum of **1** in  $\text{CDCl}_3$  (600 MHz).

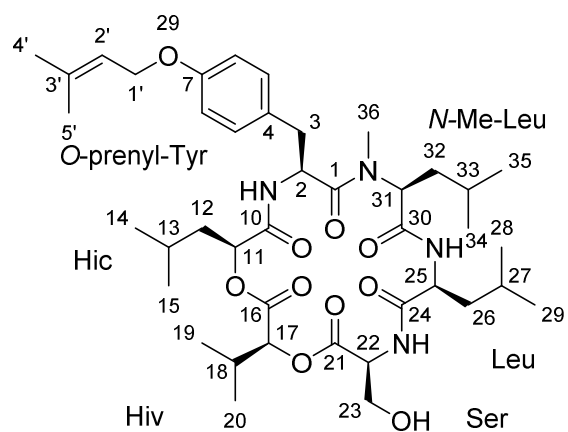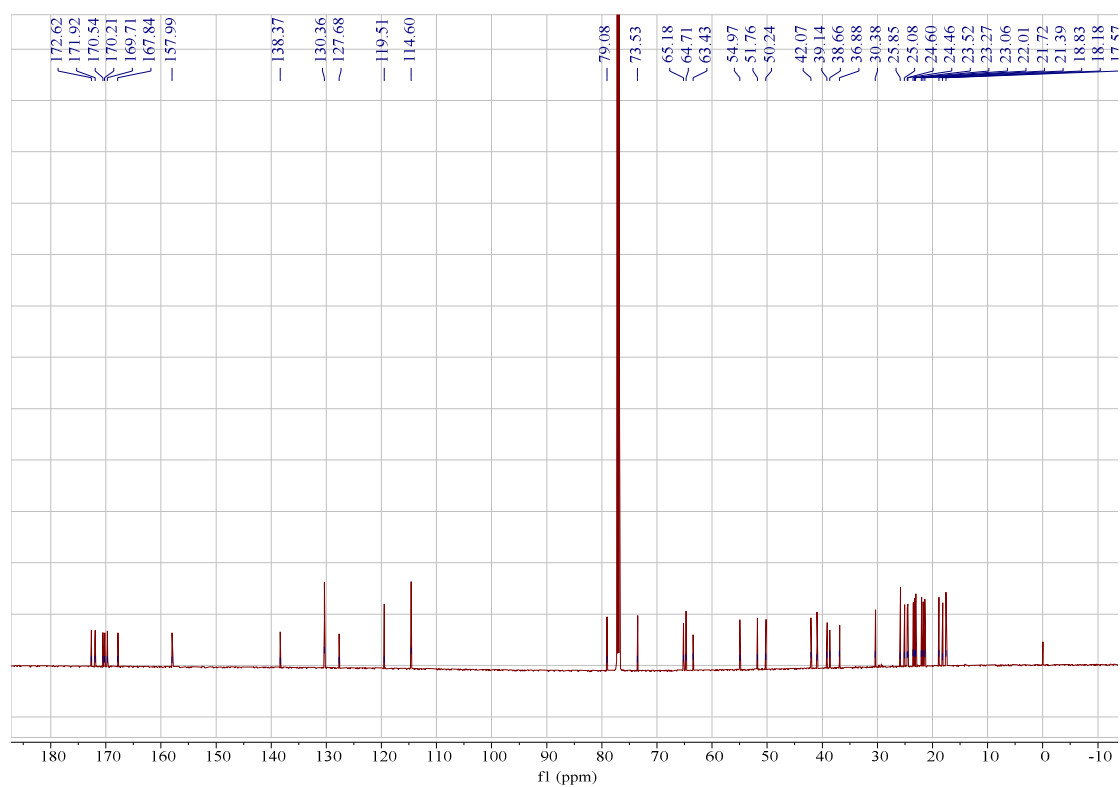

**Figure S3.**  $^{13}\text{C}$  NMR spectrum of **1** in  $\text{CDCl}_3$  (150 MHz).

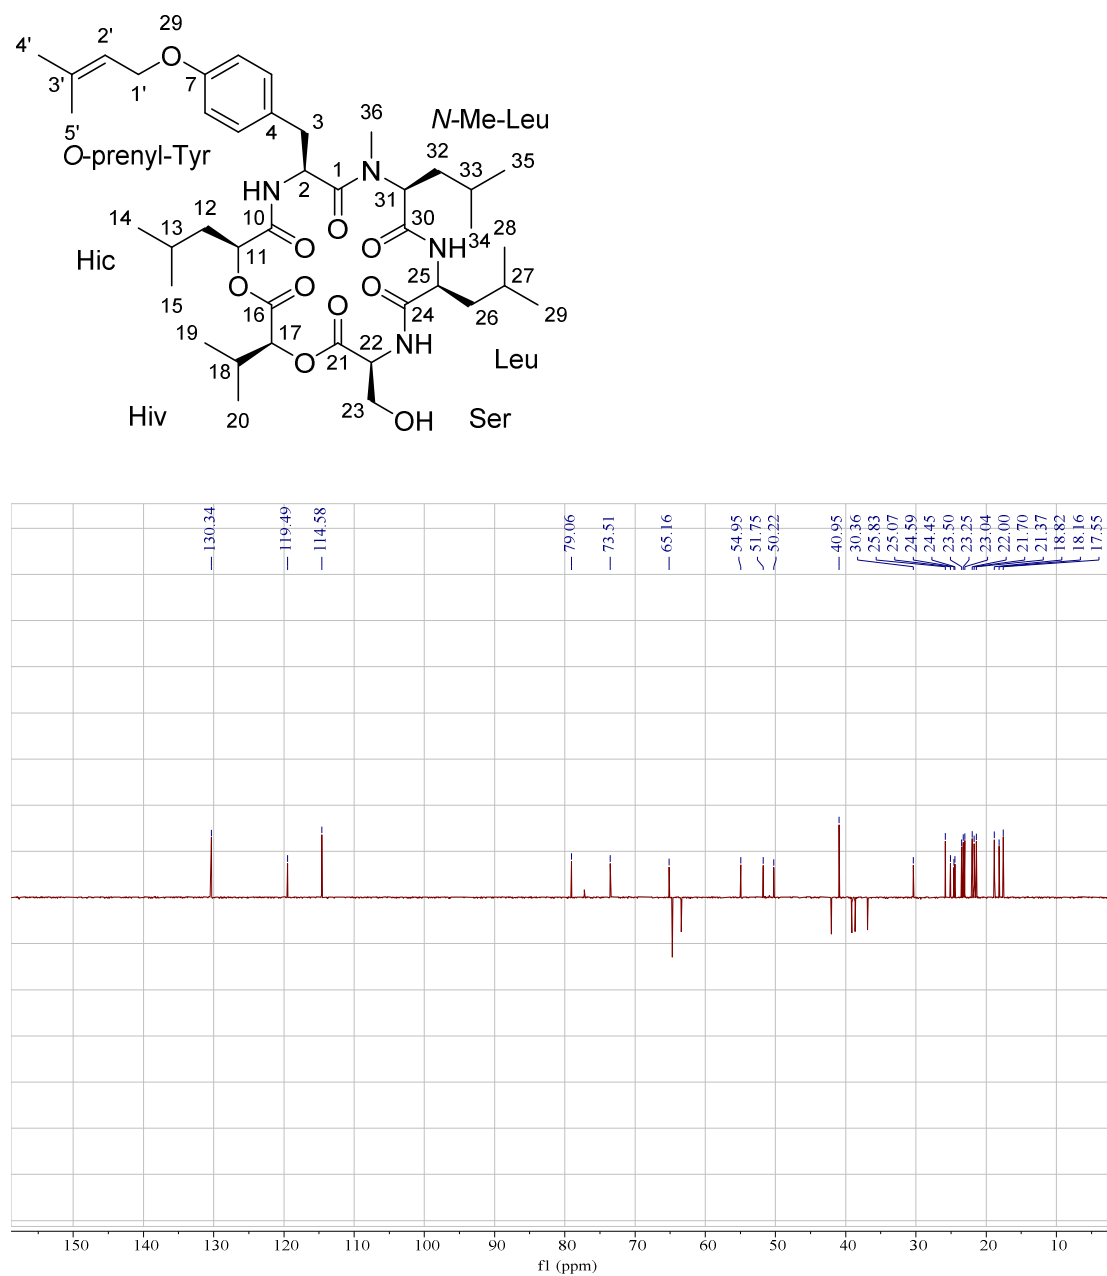

**Figure S4.** DEPT135 spectrum of **1** in CDCl<sub>3</sub> (150 MHz).

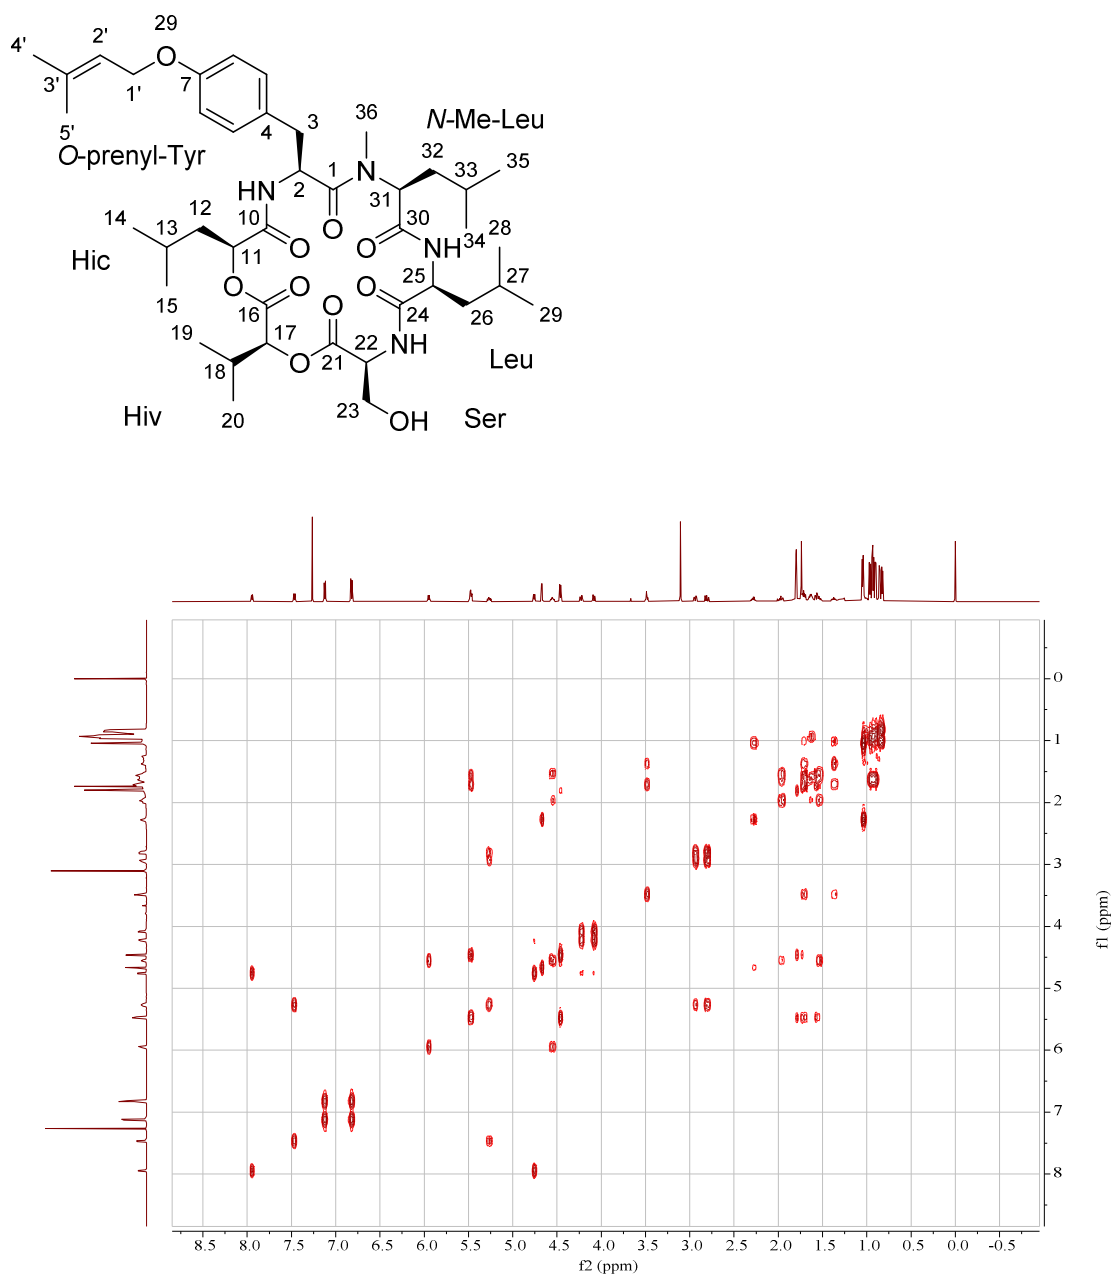

**Figure S5.**  $^1\text{H}$ - $^1\text{H}$  COSY spectrum of **1** in  $\text{CDCl}_3$ .

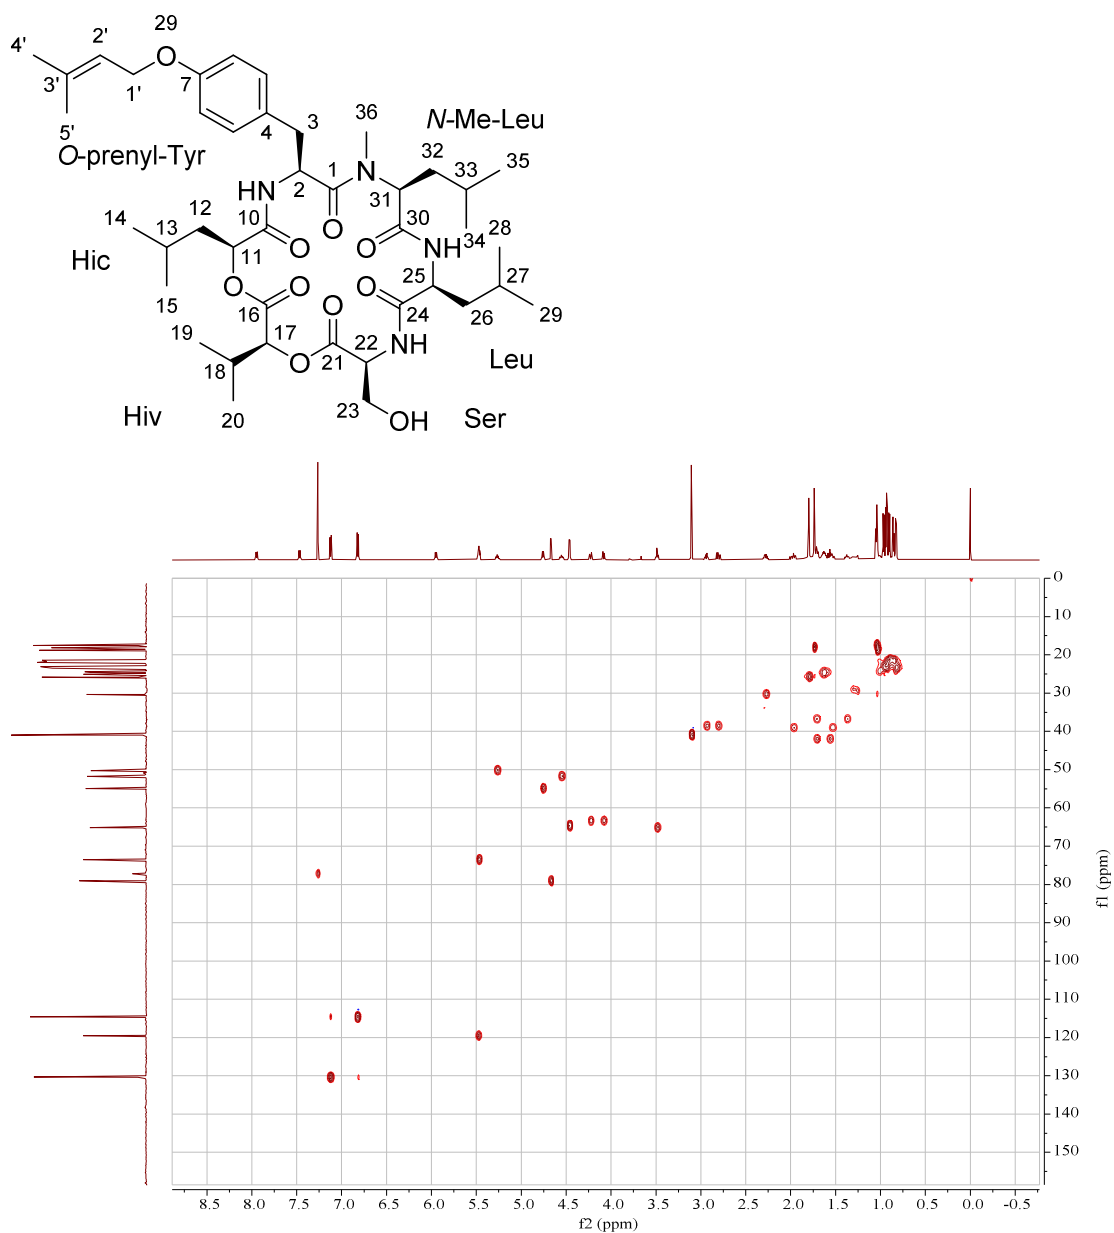

**Figure S6.** HSQC spectrum of **1** in CDCl<sub>3</sub>.



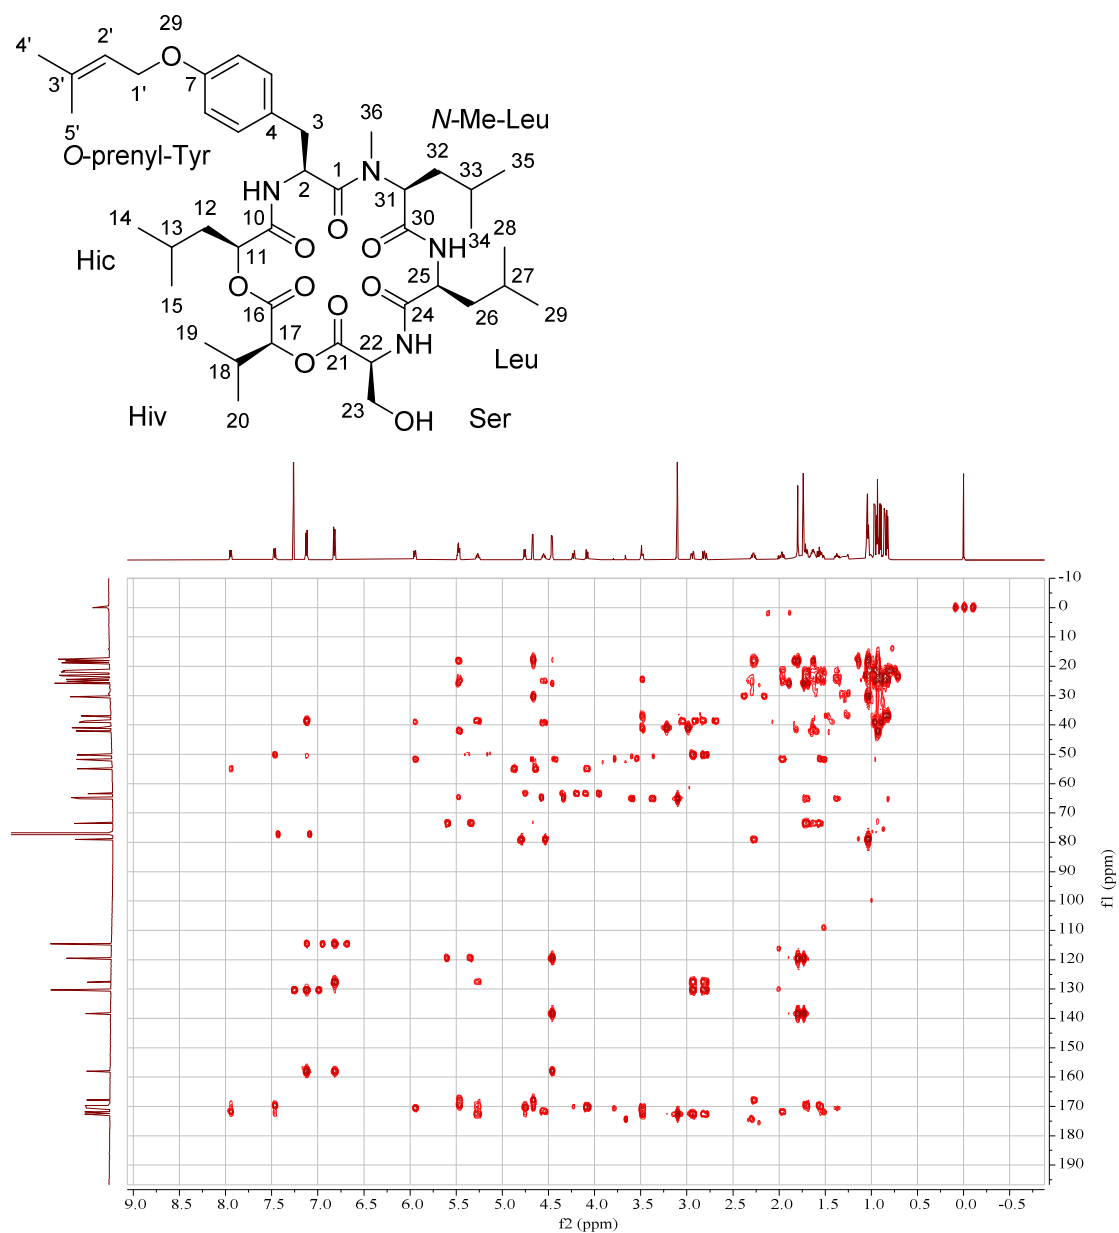

**Figure S7.** HMBC spectrum of **1** in CDCl<sub>3</sub>.

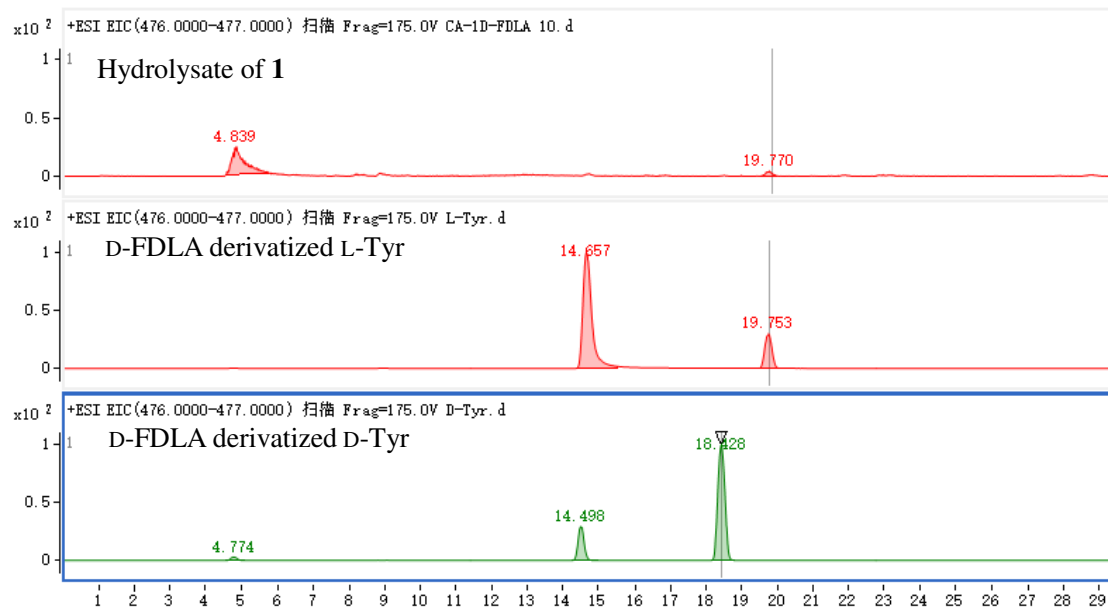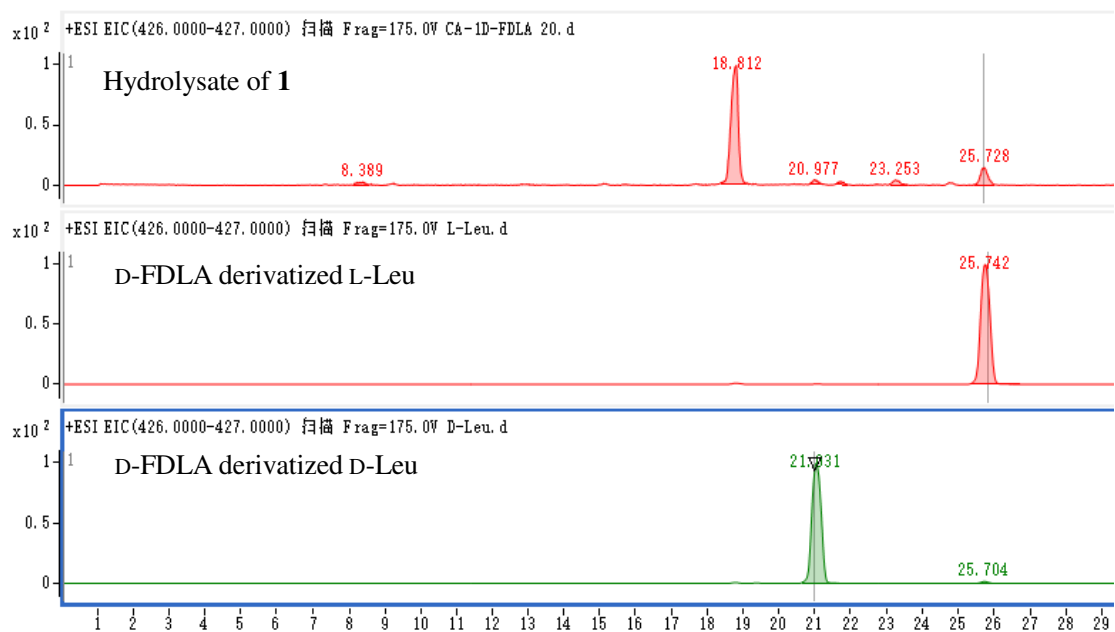

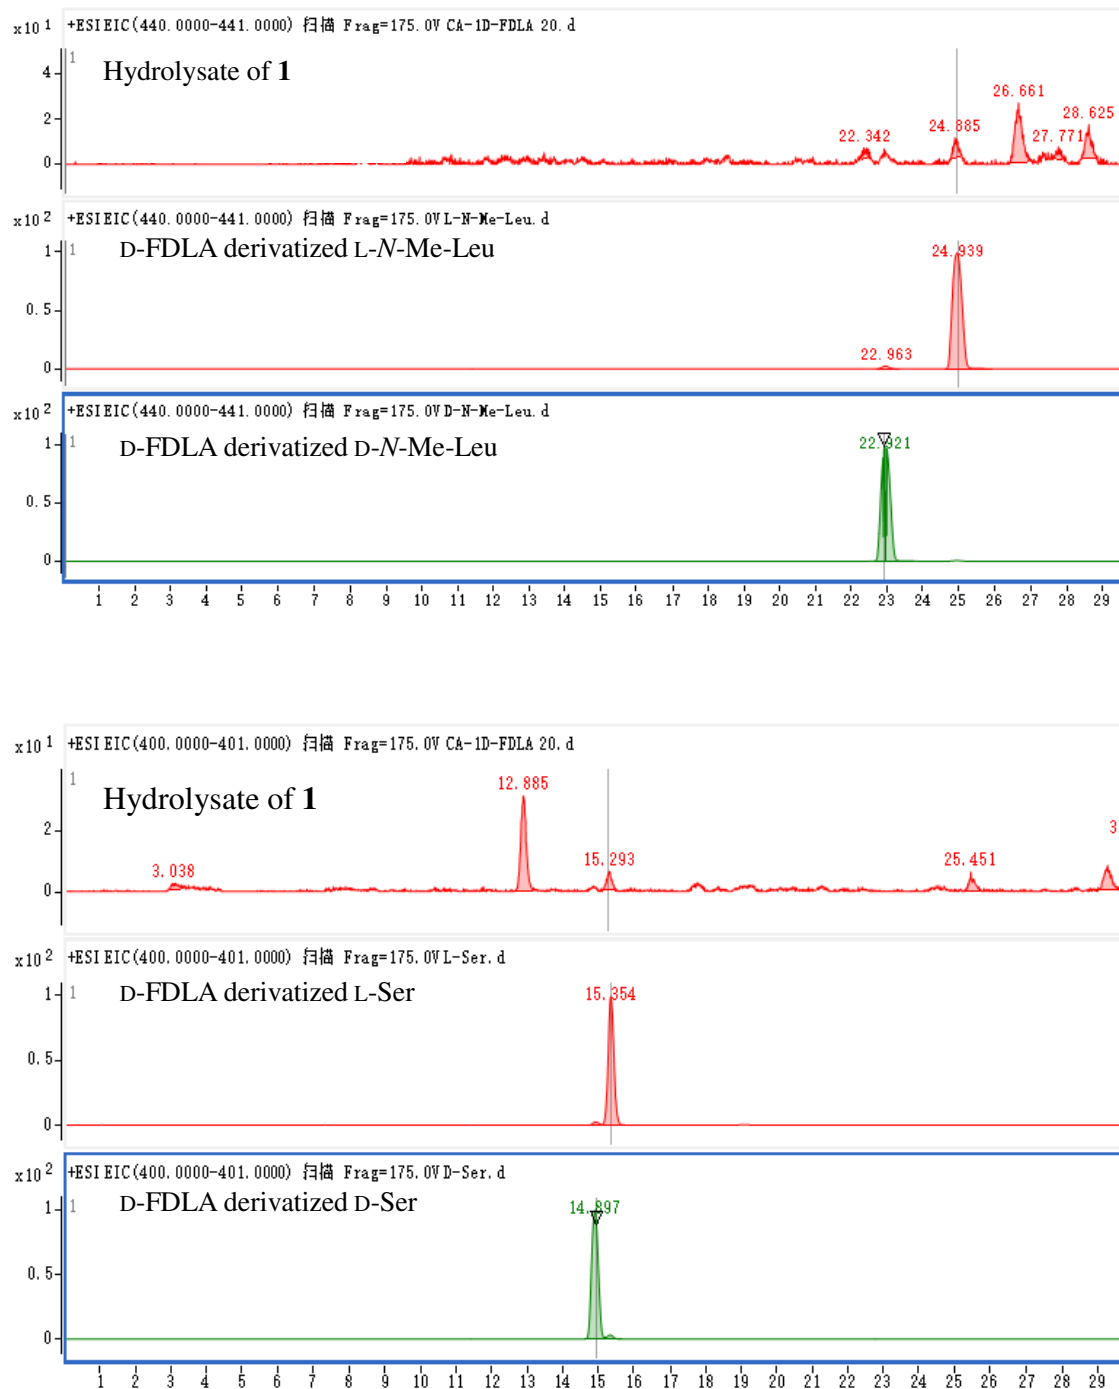

**Figure S8.** Chromatographic profiles of amino acids from compound **1** acid hydrolysis products

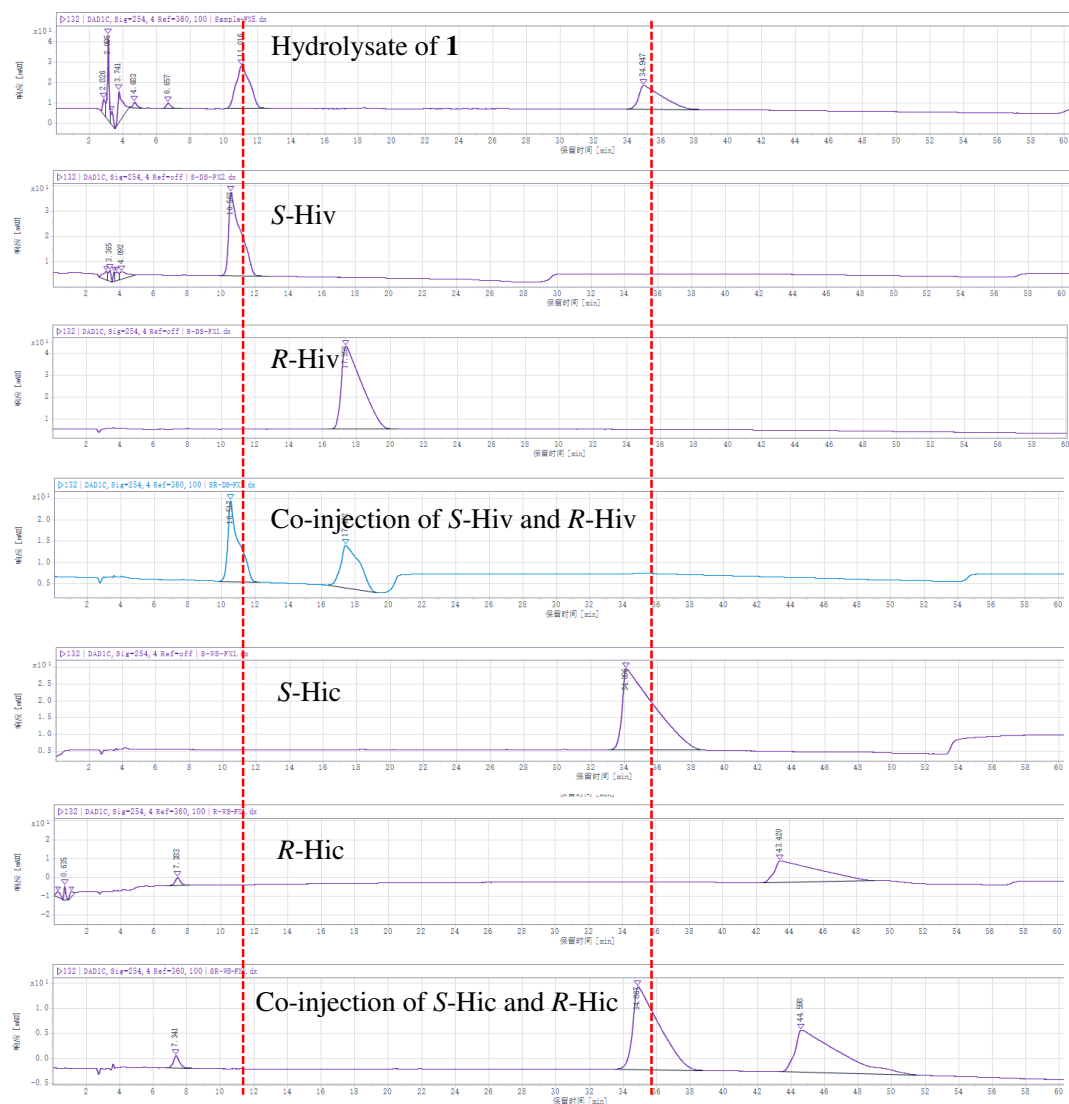

**Figure S9.** Chiral HPLC analysis performed on hydrolysis products of **1**.
